# Supplementary material for: A Systematic Review and Meta-analysis of the Prevalence of Community-Onset Bloodstream Infections among Hospitalized Patients in Africa and Asia
Source: PubMed Central journal article supplement (PMC7187598; doi:10.1128/aac.01974-19), 2019-12-20
Supplement: AAC.01974-19-s0001.pdf [file AAC.01974-19-s0001.pdf]

## Supplement 1

### Final search strategy 19 September 2018

#### Pubmed 19 September 18

(incidence[tiab] OR epidemiol\*[tiab] OR prevalence[tiab] OR "prevalence"[Mesh] OR etiology[tiab] OR aetiology OR frequency[tiab] OR burden OR "Bacteremia/epidemiology"[MAJR] OR "Fever/etiology"[MeSH Terms])

AND

(febrile[tiab] OR "bloodstream infection" OR "bloodstream infections" OR "blood stream infection" OR "blood stream infections" OR "BSI" OR bacteremia OR bacteraemia OR enteric OR septicemia[tiab] OR septicaemia[tiab])

NOT

(cancer[all] OR malignant[all] OR malignancy[all] OR malignancies[all] OR leukemia[all] OR myeloid[all] OR dental[all] OR periodon\*[all] OR tooth[tiab] OR teeth[tiab] OR neutropenia[all] OR neutropaenia[all] OR seizur\*[tiab] OR "influenza A"[tiab] OR "influenzae A"[tiab] OR "influenza B"[tiab] OR "influenzae B"[tiab] OR "influenza virus"[tiab] OR "yellow fever"[all] OR "hay fever"[all] OR scarlet[all] OR rheumatic[all] OR norovirus[all] OR arbovirus[all] OR ebola[all] OR sickle[tiab] OR ricket\*[tiab] OR hantavirus[all] OR rotavirus[all] OR measles[all] OR chickenpox[all] OR varicella[all] OR animal[tiab] OR pig[tiab] OR horse[tiab] OR foal[tiab] OR equine[tiab] OR hen[tiab] OR chicken[tiab] OR poultry[tiab] OR cow[tiab] OR milk[tiab] OR mouse[tiab] OR mice[tiab] OR heart[tiab] OR surg\*[tiab] OR gene[tiab] OR genes[tiab] OR genomic[tiab] OR polymerase[tiab] OR polio[tiab] OR hepatitis[tiab] OR hemorr\*[tiab] OR haemorr\* OR genetic\*[tiab] OR gout[tiab] OR arthritis[tiab] OR cystic[tiab] OR fruit[tiab] OR egg[tiab] OR juice[tiab] OR fresh[tiab] OR assay[tiab] OR plasmid[tiab] OR microarray[tiab] OR array[tiab] OR biomarker[tiab] OR sequencing[tiab] OR sequence[tiab] OR climate[tiab] OR tick[tiab] OR "tick-borne"[tiab] OR "in vitro"[tiab] OR "in vivo"[tiab] OR "in situ"[tiab] OR transplan\*[tiab] OR "UTI"[tiab] OR urinary[tiab] OR catheter[tiab] OR "hospital-acquired"[tiab] OR "healthcare-associated"[tiab] OR "healthcare associated"[tiab] OR "hospital-associated"[tiab] OR "HAI"[tiab] OR nosoc\*[all] OR "line-associated"[tiab] OR "central line"[tiab] OR "health care-associated"[tiab] OR transfusion[tiab] OR plasma[tiab] OR shock[tiab] OR convul\*[all] OR epilep\*[all] OR "enteric-coated"[tiab] OR "aspirin"[tiab] OR nutrition\*[tiab] OR coronary[tiab] OR "bowel disease"[tiab] OR "crohn's"[tiab] OR pregn\*[tiab] OR fetal[tiab] OR "neonatal sepsis"[tiab] OR preterm[tiab] OR "pre-term"[tiab] OR environmental[tiab] OR retrospective[all] OR retrospectively[all] OR "case report"[all] OR "case reports"[all] OR case-control[all]) AND (hasabstract[text] AND Humans[Mesh])

## Scopus 19 September 2018

(( (TITLE-ABS-KEY (incidence) OR TITLE-ABS-KEY (epidemiology) OR TITLE-ABS-KEY (prevalence) OR TITLE-ABS-KEY (etiology) OR TITLE-ABS-KEY (aetiology) OR TITLE-ABS-KEY (frequency) OR TITLE-ABS-KEY (burden) ))

AND

(( TITLE-ABS-KEY (febrile) OR TITLE-ABS-KEY ("bloodstream infection") OR TITLE-ABS-KEY ("bloodstream infections") OR TITLE-ABS-KEY ("blood stream infection") OR TITLE-ABS-KEY ("blood stream infections") OR TITLE-ABS-KEY ("BSI") OR TITLE-ABS-KEY (bacteremia) OR TITLE-ABS-KEY (bacteraemia) OR TITLE-ABS-KEY ("enteric") OR TITLE-ABS-KEY (septicemia) OR TITLE-ABS-KEY (septicaemia) ))

AND NOT

(( (TITLE-ABS-KEY (cancer) OR TITLE-ABS-KEY (malignant) OR TITLE-ABS-KEY (malignancy) OR TITLE-ABS-KEY (malignancies) OR TITLE-ABS-KEY (dental) OR TITLE-ABS-KEY (periodon\*) OR TITLE-ABS-KEY (tooth) OR TITLE-ABS-KEY (teeth) OR TITLE-ABS-KEY (neutrop\*) OR TITLE-ABS-KEY (seizure\*) OR TITLE-ABS-KEY ("yellow fever") OR TITLE-ABS-KEY ("hay fever") OR TITLE-ABS-KEY (\*virus) OR TITLE-ABS-KEY (scarlet) OR TITLE-ABS-KEY (rheumatic) OR TITLE-ABS-KEY (ebola) OR TITLE-ABS-KEY (sickle) OR TITLE-ABS-KEY (rickettsia) OR TITLE-ABS-KEY (measles) OR TITLE-ABS-KEY (chickenpox) OR TITLE-ABS-KEY (varicella) OR TITLE-ABS-KEY (pig) OR TITLE-ABS-KEY (horse) OR TITLE-ABS-KEY (foal) OR TITLE-ABS-KEY (equine) OR TITLE-ABS-KEY (hen) OR TITLE-ABS-KEY (chicken) OR TITLE-ABS-KEY (poultry) OR TITLE-ABS-KEY (cow) OR TITLE-ABS-KEY (milk) OR TITLE-ABS-KEY (mouse) OR TITLE-ABS-KEY (mice) OR TITLE-ABS-KEY (heart) OR TITLE-ABS-KEY (surgery) OR TITLE-ABS-KEY (gene) OR TITLE-ABS-KEY (genes) OR TITLE-ABS-KEY (genomic) OR TITLE-ABS-KEY (polymerase) OR TITLE-ABS-KEY ("influenza a") OR TITLE-ABS-KEY ("influenzae a") OR TITLE-ABS-KEY ("influenza b") OR TITLE-ABS-KEY ("influenzae b") OR TITLE-ABS-KEY ("influenza virus") OR TITLE-ABS-KEY ("influenza-like") OR TITLE-ABS-KEY (polio) OR TITLE-ABS-KEY (hepatitis) OR TITLE-ABS-KEY (hemorrhagic) OR TITLE-ABS-KEY (haemorrhagic) OR TITLE-ABS-KEY (genetic) OR TITLE-ABS-KEY (gout) OR TITLE-ABS-KEY (arthritis) OR TITLE-ABS-KEY (cystic) OR TITLE-ABS-KEY (fruit) OR TITLE-ABS-KEY (egg) OR TITLE-ABS-KEY (juice) OR TITLE-ABS-KEY (fresh) OR TITLE-ABS-KEY (assay) OR TITLE-ABS-KEY (plasmid) OR TITLE-ABS-KEY (microarray) OR TITLE-ABS-KEY (array) OR TITLE-ABS-KEY (biomarker) OR TITLE-ABS-KEY (sequencing) OR TITLE-ABS-KEY (sequence) OR TITLE-ABS-KEY (climate) OR TITLE-ABS-KEY (tick) OR TITLE-ABS-KEY ("tick-borne") OR TITLE-ABS-KEY ("in vitro") OR TITLE-ABS-KEY ("in vivo") OR TITLE-ABS-KEY ("in situ") OR TITLE-ABS-KEY (transplantation) OR TITLE-ABS-KEY (transplant) OR TITLE-ABS-KEY ("UTI") OR TITLE-ABS-KEY (urinary) OR TITLE-ABS-KEY (catheter) OR TITLE-ABS-KEY ("hospital-acquired") OR TITLE-ABS-KEY ("healthcare-associated") OR TITLE-ABS-KEY ("healthcare associated") OR TITLE-ABS-KEY ("hospital-associated") OR TITLE-ABS-KEY ("HAI") OR TITLE-ABS-KEY (nosocomial) OR TITLE-ABS-KEY ("line-associated") OR TITLE-ABS-KEY ("central line") OR TITLE-ABS-KEY ("health care-associated") OR TITLE-ABS-KEY (transfusion) OR TITLE-ABS-KEY (plasma) OR TITLE-ABS-KEY (shock) OR TITLE-ABS-KEY (epilepsy) OR TITLE-ABS-KEY (convulsion\*) OR TITLE-ABS-KEY ("enteric-coated") OR TITLE-ABS-KEY ("aspirin") OR TITLE-ABS-KEY (nutrition\*) OR TITLE-ABS-KEY (coronary) OR TITLE-ABS-KEY ("bowel disease") OR TITLE-ABS-KEY ("crohn's") OR TITLE-ABS-KEY (pregnant) ))

OR TITLE-ABS-KEY ( pregnancy ) OR TITLE-ABS-KEY ( fetal ) OR TITLE-ABS-KEY ( "neonatal sepsis" ) OR TITLE-ABS-KEY ( preterm ) OR TITLE-ABS-KEY ( "pre-term" ) OR TITLE-ABS-KEY ( environmental ) OR TITLE-ABS-KEY ( retrospective ) OR TITLE-ABS-KEY ( retrospectively ) OR TITLE-ABS-KEY ( "case report" ) OR TITLE-ABS-KEY ( "case reports" ) OR TITLE-ABS-KEY ( case-control ) OR TITLE-ABS-KEY ( animals ) OR TITLE-ABS-KEY ( animal )))) AND ( EXCLUDE ( DOCTYPE , "re" ) OR EXCLUDE ( DOCTYPE , "le" ) OR EXCLUDE ( DOCTYPE , "cp" ) OR EXCLUDE ( DOCTYPE , "ed" ) OR EXCLUDE ( DOCTYPE , "no" ) OR EXCLUDE ( DOCTYPE , "sh" ) OR EXCLUDE ( DOCTYPE , "ch" ) OR EXCLUDE ( DOCTYPE , "ip" ) OR EXCLUDE ( DOCTYPE , "er" ) OR EXCLUDE ( DOCTYPE , "bk" ) OR EXCLUDE ( DOCTYPE , "tb" ) ) AND ( EXCLUDE ( SUBJAREA , "NURS" ) OR EXCLUDE ( SUBJAREA , "AGRI" ) OR EXCLUDE ( SUBJAREA , "PHAR" ) OR EXCLUDE ( SUBJAREA , "NEUR" ) OR EXCLUDE ( SUBJAREA , "VETE" ) OR EXCLUDE ( SUBJAREA , "PSYC" ) OR EXCLUDE ( SUBJAREA , "ENVI" ) OR EXCLUDE ( SUBJAREA , "HEAL" ) OR EXCLUDE ( SUBJAREA , "SOCI" ) OR EXCLUDE ( SUBJAREA , "ENGI" ) OR EXCLUDE ( SUBJAREA , "ARTS" ) OR EXCLUDE ( SUBJAREA , "MULT" ) OR EXCLUDE ( SUBJAREA , "CENG" ) OR EXCLUDE ( SUBJAREA , "CHEM" ) OR EXCLUDE ( SUBJAREA , "EART" ) OR EXCLUDE ( SUBJAREA , "MATH" ) OR EXCLUDE ( SUBJAREA , "PHYS" ) OR EXCLUDE ( SUBJAREA , "COMP" ) OR EXCLUDE ( SUBJAREA , "DENT" ) OR EXCLUDE ( SUBJAREA , "ECON" ) OR EXCLUDE ( SUBJAREA , "MATE" ) OR EXCLUDE ( SUBJAREA , "DECI" ) OR EXCLUDE ( SUBJAREA , "ENER" ) ) AND ( EXCLUDE ( EXACTKEYWORD , "Nonhuman" ) )

## Web of Science 19 September 2018

# 1

TS=(incidence) OR TS=(epidemiology) OR TS=(prevalence) OR TS=(etiology) OR  
TS=(aetiology) OR TS=(frequency) OR TS=(burden)

Indexes=SCI-EXPANDED, ESCI Timespan=All years

# 2

TS=(febrile) OR TS=("bloodstream infection") OR TS=("bloodstream infections") OR  
TS=("blood stream infection") OR TS=("blood stream infections") OR TS=("BSI") OR  
TS=(bacteremia) OR TS=(bacteraemia) OR TS=(enteric) OR TS=(septicemia) OR  
TS=(septicaemia)

Indexes=SCI-EXPANDED, ESCI Timespan=All years

# 3

#2 AND #1 NOT TS=(cancer OR malignant OR malignancy OR malignancies OR leukemia  
OR myeloid OR dental OR periodon\* OR tooth OR teeth OR neutropenia OR neutropaenia  
OR seizure OR seizures OR "influenza A" OR "influenzae A" OR "influenza B" OR  
"influenzae B" OR "influenza virus" OR "yellow fever" OR "hay fever" OR scarlet OR  
rheumatic OR norovirus OR Ebola OR sickle OR rickettsia OR hantavirus OR rotavirus OR  
measles OR chickenpox OR varicella OR pig OR horse OR foal OR equine OR hen OR  
chicken OR poultry OR cow OR milk OR mouse OR mice OR heart OR surgery OR  
surgeries OR gene OR genes OR genomic OR polymerase OR polio OR hepatitis OR  
hemorrhagic OR haemorrhagic OR genetic OR gout OR arthritis OR cystic OR fruit OR egg  
OR juice OR fresh OR assay OR plasmid OR microarray OR array OR biomarker OR  
sequencing OR sequence OR climate OR tick OR "tick-borne" OR "in vitro" OR "in vivo" OR  
"in situ" OR transplant\* OR "UTI" OR urinary OR catheter OR "hospital-acquired" OR  
"healthcare-associated" OR "healthcare associated" OR "hospital-associated" OR "HAI" OR  
nosoc\* OR "line-associated" OR "central line" OR "health care-associated" OR transfusion  
OR plasma OR shock OR convul\* OR epilep\* OR "enteric-coated" OR "aspirin" OR nutrition\*  
OR coronary OR "bowel disease" OR "crohn's" OR pregnant OR pregnancy OR fetal OR  
"neonatal sepsis" OR preterm OR "pre-term" OR environmental OR retrospective OR  
retrospectively OR "case report" OR "case reports" OR case-control OR animals OR animal)

Refined by: [excluding] DOCUMENT TYPES: ( PROCEEDINGS PAPER OR NOTE OR  
DISCUSSION OR REVIEW OR EDITORIAL MATERIAL OR CORRECTION OR REPRINT  
OR MEETING ABSTRACT OR LETTER OR BOOK CHAPTER ) AND [excluding] WEB OF  
SCIENCE CATEGORIES: ( ENDOCRINOLOGY METABOLISM OR ANESTHESIOLOGY  
OR CARDIAC CARDIOVASCULAR SYSTEMS OR CHEMISTRY ANALYTICAL OR  
DENTISTRY ORAL SURGERY MEDICINE OR TRANSPLANTATION OR SURGERY OR  
OTORHINOLARYNGOLOGY OR SUBSTANCE ABUSE OR VETERINARY SCIENCES OR  
CLINICAL NEUROLOGY OR ENGINEERING ENVIRONMENTAL OR PHYSICS APPLIED  
OR PSYCHIATRY OR REPRODUCTIVE BIOLOGY OR NEUROSCIENCES OR  
DERMATOLOGY OR OBSTETRICS GYNECOLOGY OR UROLOGY NEPHROLOGY OR  
ECONOMICS OR ENGINEERING ELECTRICAL ELECTRONIC OR ONCOLOGY )

## Supplement 2

### Bias assessment

| Author, year         | Patient flow/study design (e.g. active surveillance, observational) introduced bias? (H/M/L/U) | Likelihood that patient selection could have introduced bias (age/sex/community)? (H/M/L/U) | Study included only hospitalized or admitted patients (e.g. if ED, then No)? (Y/N) | Reporting blood culture volume adequacy? (Y/N) | Proportion of blood culture contaminants? (H/M/L/U) | Bias of criteria (e.g. days of fever, temp) to draw a blood culture? (H/M/L/U) | Bias that investigators may not have reported all pathogens? (H/M/L/U) | Overall assessment of quality (H/M/L) |
|----------------------|------------------------------------------------------------------------------------------------|---------------------------------------------------------------------------------------------|------------------------------------------------------------------------------------|------------------------------------------------|-----------------------------------------------------|--------------------------------------------------------------------------------|------------------------------------------------------------------------|---------------------------------------|
| Akpede, 1992         | L                                                                                              | L                                                                                           | N                                                                                  | N                                              | M                                                   | L                                                                              | M                                                                      | L                                     |
| Archibald, 1998      | L                                                                                              | L                                                                                           | Y                                                                                  | N                                              | L                                                   | L                                                                              | L                                                                      | H                                     |
| Archibald, 1999      | L                                                                                              | L                                                                                           | Y                                                                                  | N                                              | L                                                   | L                                                                              | L                                                                      | H                                     |
| Ayoola, 2003         | L                                                                                              | H                                                                                           | N                                                                                  | N                                              | U                                                   | L                                                                              | L                                                                      | L                                     |
| Bell, 2001           | L                                                                                              | M                                                                                           | Y                                                                                  | N                                              | U                                                   | L                                                                              | L                                                                      | M                                     |
| Blomberg, 2007       | L                                                                                              | M                                                                                           | Y                                                                                  | N                                              | U                                                   | H                                                                              | L                                                                      | L                                     |
| Chheng, 2013         | L                                                                                              | L                                                                                           | Y                                                                                  | Y                                              | M                                                   | L                                                                              | L                                                                      | M                                     |
| Christopher, 2013    | L                                                                                              | H                                                                                           | Y                                                                                  | N                                              | M                                                   | L                                                                              | M                                                                      | L                                     |
| Crocker, 1985        | L                                                                                              | H                                                                                           | N                                                                                  | N                                              | L                                                   | H                                                                              | L                                                                      | L                                     |
| Crump, 2011          | L                                                                                              | L                                                                                           | Y                                                                                  | Y                                              | M                                                   | L                                                                              | L                                                                      | M                                     |
| Crump, 2011          | L                                                                                              | L                                                                                           | Y                                                                                  | Y                                              | M                                                   | L                                                                              | L                                                                      | M                                     |
| de la Torre, 2017    | L                                                                                              | H                                                                                           | N                                                                                  | N                                              | U                                                   | H                                                                              | L                                                                      | L                                     |
| Dougle, 1997         | L                                                                                              | M                                                                                           | Y                                                                                  | N                                              | L                                                   | L                                                                              | L                                                                      | M                                     |
| Gordon, 2001         | L                                                                                              | L                                                                                           | Y                                                                                  | N                                              | U                                                   | L                                                                              | L                                                                      | M                                     |
| Guiraud, 2017        | L                                                                                              | M                                                                                           | N                                                                                  | N                                              | U                                                   | H                                                                              | L                                                                      | L                                     |
| Hyams, 1986          | L                                                                                              | H                                                                                           | Y                                                                                  | N                                              | U                                                   | L                                                                              | U                                                                      | L                                     |
| Jaffe, 1987          | M                                                                                              | H                                                                                           | N                                                                                  | N                                              | U                                                   | M                                                                              | M                                                                      | L                                     |
| Kassa-Kelembho, 2003 | L                                                                                              | M                                                                                           | Y                                                                                  | N                                              | L                                                   | M                                                                              | L                                                                      | L                                     |
| Kelly, 2011          | L                                                                                              | M                                                                                           | Y                                                                                  | N                                              | M                                                   | H                                                                              | L                                                                      | L                                     |
| Kibuuka, 2015        | M                                                                                              | H                                                                                           | N                                                                                  | N                                              | M                                                   | H                                                                              | L                                                                      | L                                     |
| Lee, 2012            | L                                                                                              | L                                                                                           | N                                                                                  | N                                              | L                                                   | M                                                                              | L                                                                      | M                                     |

|                    |   |   |   |   |   |   |   |          |
|--------------------|---|---|---|---|---|---|---|----------|
| Leelarasamee, 2004 | L | H | Y | N | U | H | L | <b>L</b> |
| Limper, 2011       | L | M | N | N | M | L | L | <b>M</b> |
| Lin, 1991          | L | M | N | U | U | L | L | <b>L</b> |
| Liu, 1985          | L | H | N | N | U | H | L | <b>L</b> |
| Mave, 2017         | M | M | Y | N | H | L | L | <b>L</b> |
| McCarthy, 1977     | L | H | N | N | L | M | L | <b>L</b> |
| Mellors, 1987      | L | M | N | N | U | M | M | <b>L</b> |
| Mintegi, 2009      | L | H | N | N | U | L | L | <b>L</b> |
| Morch, 2017        | L | M | Y | N | L | M | L | <b>M</b> |
| Nadjm, 2010        | L | M | Y | N | M | L | L | <b>L</b> |
| Nadjm, 2012        | L | M | Y | N | U | H | L | <b>L</b> |
| Okwara, 2004       | L | M | Y | N | M | M | L | <b>L</b> |
| Pavlinac, 2015     | M | M | N | N | L | M | L | <b>L</b> |
| Peters, 2004       | L | H | Y | N | U | M | L | <b>L</b> |
| Petit, 1995        | M | H | Y | N | U | M | L | <b>L</b> |
| Preziosi, 2015     | M | M | Y | N | M | H | L | <b>L</b> |
| Punjabi, 2012      | L | H | Y | N | U | M | L | <b>L</b> |
| Ssali, 1998        | L | M | Y | N | U | L | M | <b>L</b> |
| Teach, 1997        | L | M | N | N | U | M | L | <b>L</b> |
| Thriemer, 2012     | L | M | N | N | M | L | M | <b>L</b> |
| Tokuda, 2005       | L | M | N | N | U | M | M | <b>L</b> |
| Walsh, 2000        | L | H | Y | N | U | L | L | <b>L</b> |
| Yamamoto, 1987     | L | M | N | N | M | M | L | <b>L</b> |

### Supplement 3

#### Association of HIV infection status with community-acquired bloodstream infections, global, 1995-2018

| Organism                                                                  | Total febrile patients | No BSI or HIV | BSI and HIV infected | BSI and HIV uninfected | OR (95% CI)      | p-value |
|---------------------------------------------------------------------------|------------------------|---------------|----------------------|------------------------|------------------|---------|
| <i>Mycobacterium tuberculosis</i> complex <sup>39,40,42,47,55,72,76</sup> | 2,174                  | 750           | 201                  | 5                      | 24.8 (10.1-60.4) | <0.001  |
| Non-typhoidal <i>Salmonella</i> <sup>39,40,47,48,55,69,72</sup>           | 2,229                  | 1,061         | 111                  | 10                     | 11.2 (5.9-21.6)  | <0.001  |
| <i>Streptococcus pneumoniae</i> <sup>39,40,48,55,69,72,76</sup>           | 2,123                  | 880           | 43                   | 18                     | 1.8 (1.0-3.1)    | 0.043   |
| <i>Escherichia coli</i> <sup>39,40,47,48,55,69,72,76</sup>                | 2,528                  | 1,124         | 21                   | 18                     | 1.0 (0.5-1.8)    | 0.901   |
| <i>Staphylococcus aureus</i> <sup>39,40,47,69,76</sup>                    | 1,647                  | 712           | 13                   | 13                     | 0.78 (0.36-1.7)  | 0.537   |
| <i>Salmonella enterica</i> serotype Typhi <sup>39,47,48,55,69</sup>       | 297                    | 53            | 5                    | 32                     | 0.04 (0.01-0.11) | <0.001  |
|                                                                           |                        |               |                      |                        |                  |         |
| Any BSI <sup>39,40,42,43,47,48,55,68,69,72,74,76</sup>                    | 8,109                  | 5030          | 676                  | 566                    | 3.3 (2.9-4.7)    | <0.001  |

BSI = bloodstream infection; OR = odds ratio
